1  
2  
3  
4  
5  
6  
7  
8  
9  
10  
11  
12  
13  
14  
15  
16  
17  
18  
19  
20  
21  
22  
23  
24

## HLA-B\*39:06 Efficiently Mediates Type 1 Diabetes in a Mouse Model

### Incorporating Reduced Thymic Insulin Expression<sup>1</sup>

Jennifer Schloss,<sup>\*</sup> Riyasat Ali,<sup>\*</sup> Jeremy J. Racine,<sup>†</sup> Harold D. Chapman,<sup>†</sup>

David V. Serreze,<sup>†</sup> and Teresa P. DiLorenzo<sup>\*,‡,2</sup>

<sup>\*</sup>Department of Microbiology and Immunology, Albert Einstein College of Medicine, Bronx, NY 10461; <sup>†</sup>The Jackson Laboratory, Bar Harbor, ME 04609; and <sup>‡</sup>Department of Medicine (Division of Endocrinology), Albert Einstein College of Medicine, Bronx, NY 10461

**Address correspondence to:** Teresa P. DiLorenzo (Phone: 718-430-2014; Fax: 718-430-8711;

E-mail: [teresa.dilorenzo@einstein.yu.edu](mailto:teresa.dilorenzo@einstein.yu.edu))

**Running title:** HLA-B\*39:06 mediates type 1 diabetes

1       **ABSTRACT**

2               Type 1 diabetes (T1D) is characterized by T cell-mediated destruction of the insulin-  
3       producing  $\beta$  cells of the pancreatic islets. Among the loci associated with T1D risk, those most  
4       predisposing are found in the MHC region. HLA-B\*39:06 is the most predisposing class I MHC  
5       allele and is associated with an early age of onset. To establish an NOD mouse model for the  
6       study of HLA-B\*39:06, we expressed it in the absence of murine class I MHC. HLA-B\*39:06  
7       was able to mediate the development of CD8 T cells, support lymphocytic infiltration of the  
8       islets, and confer T1D susceptibility. Because reduced thymic insulin expression is associated  
9       with increased T1D risk in patients, we incorporated this in our model as well, finding that HLA-  
10      B\*39:06-transgenic NOD mice with reduced thymic insulin expression have an earlier age of  
11      disease onset and a higher overall prevalence as compared to littermates with typical thymic  
12      insulin expression. This was despite virtually indistinguishable blood insulin levels, T cell  
13      subset percentages, and TCR V $\beta$  family usage, indicating that reduced thymic insulin expression  
14      does not impact T cell development on a global scale. Rather, we propose that it allows the  
15      thymic escape of insulin-reactive HLA-B\*39:06-restricted T cells which participate in  $\beta$  cell  
16      destruction. We also found that in mice expressing either HLA-B\*39:06 or HLA-A\*02:01 in the  
17      absence of murine class I MHC, HLA transgene identity alters TCR V $\beta$  usage, which may  
18      contribute to varying diabetogenic CD8 T cell repertoires in the presence of different HLA class  
19      I alleles.

## 1 INTRODUCTION

2 Type 1 diabetes (T1D)<sup>3</sup> is characterized by T cell-mediated destruction of insulin-  
3 producing  $\beta$  cells (1). Both CD4 and CD8 T cells are important for T1D pathogenesis, with CD8  
4 T cells requiring the presentation of  $\beta$  cell epitopes by class I MHC molecules in order to interact  
5 with, and eliminate, the  $\beta$  cells (2, 3). It is thus unsurprising that while multiple genetic loci have  
6 been found to contribute to T1D development, those most predisposing to T1D can be found in  
7 the MHC region (4). Several class I MHC alleles have been found to be predisposing to T1D,  
8 including HLA-A\*02:01 and HLA-B\*39:06 (5-9). While the presentation of  $\beta$  cell epitopes by  
9 HLA-A\*02:01 has long been known and extensively studied (10), HLA-B\*39:06 has only more  
10 recently gained attention as a T1D-associated allele, and much remains to be understood about  
11 its ability to confer T1D risk.

12 While T1D associations have been observed at all HLA class I loci (9), HLA-B\*39:06 is  
13 the most predisposing HLA class I allele (7, 9) and, importantly, is associated with an early age  
14 of onset (11). Furthermore, HLA-B\*39:06 is most common among the Latin American  
15 population (12), where T1D incidence has been rising (13-15). Development of an HLA-  
16 B\*39:06-transgenic mouse model is thus of the utmost importance in order to understand the  
17 relationship between HLA-B\*39:06, genetic risk background, and T1D pathogenesis. A  
18 transgenic model is also essential for the preclinical testing of HLA-B\*39:06-targeted treatments.

19 Given the multiple risk factors associated with T1D predisposition, it is important to  
20 study HLA-B\*39:06 in a translationally relevant manner. The NOD mouse is considered by  
21 many to be a good model for human T1D (16, 17). For example, the NOD class II MHC H2-A<sup>g7</sup>  
22 shares striking similarities with several T1D-associated human class II MHC alleles such as  
23 HLA-DQ8 (18). Among other similarities, both NOD mice and human T1D patients display

1 reduced regulatory T cell function and reduced IL-2 signaling (17, 19, 20). Most importantly, T  
2 cells from HLA-transgenic NOD mice may target similar or even identical  $\beta$  cell epitopes to  
3 those found in T1D patients (21-23). However, to most accurately model HLA-B\*39:06 in the  
4 context of human T1D, it is preferable to incorporate additional human non-MHC risk alleles. In  
5 humans, the non-MHC locus that confers the most susceptibility to T1D is the variable number  
6 of tandem repeats (VNTR) region of the insulin gene (24-26). Shorter VNTR sequences are  
7 known as class I while longer VNTR sequences are known as class III. Class I VNTR sequences  
8 are associated with T1D risk and with a decrease in thymic insulin mRNA levels compared with  
9 the longer class III VNTR alleles, which are protective (24). With a resultant decrease in thymic  
10 insulin expression, there is a hypothesized increase in the escape of insulin-reactive T cells. This  
11 may explain the association between class I insulin VNTR alleles and T1D predisposition in  
12 humans (25).

13 The reduced thymic insulin expression seen in T1D patients may be modeled in mice  
14 through introduction of one or two *Insulin 2* (*Ins2*) knockout (KO) alleles (27-31). Mice possess  
15 two insulin genes, *Insulin 1* (*Ins1*) and *Ins2*. Although expressed in the pancreas, little (28, 32)  
16 to no (33, 34) *Ins1* expression occurs in the thymus. In contrast, *Ins2* is expressed in both the  
17 thymus and the pancreas (28), and both NOD mice and mouse strains not prone to T1D exhibit  
18 altered T cell tolerance to insulin upon *Ins2* ablation (28, 30, 31, 35). We have shown that NOD  
19 mice even just heterozygous (Het) for the *Ins2*<sup>KO</sup> allele exhibit decreased thymic insulin  
20 expression as seen in human T1D patients (27). In the context of HLA-A\*02:01, we have  
21 previously found that NOD mice with reduced thymic insulin expression display increased T1D  
22 incidence, islet infiltration, and CD8 T cell responses to insulin (27, 29), speaking to the  
23 importance of examining multiple risk alleles simultaneously.

1           Here we have developed HLA-B\*39:06-transgenic NOD mouse models and have  
2 demonstrated that HLA-B\*39:06 is able to independently mediate the development of CD8 T  
3 cells required for T1D onset. In the context of reduced thymic insulin expression, HLA-  
4 B\*39:06-transgenic NOD mice develop T1D at an accelerated rate compared to mice with wild-  
5 type (WT) thymic insulin expression, despite normal blood insulin levels and no gross alterations  
6 in lymphocyte composition or TCR V $\beta$  family usage. We propose that with a decrease in thymic  
7 insulin expression, HLA-B\*39:06 is less able to negatively select insulin-specific CD8 T cells  
8 and, with the high concentration of insulin found in the islets, is able to present insulin epitopes  
9 to escaped CD8 T cells. Thus, by generating HLA-B\*39:06-transgenic NOD mice in the  
10 presence of reduced thymic insulin expression, we show here the development of models that  
11 will provide excellent tools for the examination of HLA-B\*39:06's impact on T1D and for the  
12 preclinical testing of HLA-B\*39:06-targeted therapies.

## 1 MATERIALS AND METHODS

### 2 *Mice*

3 To develop HLA-B\*39:06-transgenic NOD mice, we prepared a monochain chimeric  
4 HLA-B\*39:06 construct, comprising the  $\alpha$ 1 and  $\alpha$ 2 peptide binding domains of HLA-B\*39:06  
5 linked to the  $\alpha$ 3 CD8 binding and transmembrane domains of H2-D<sup>b</sup> with human  $\beta$ 2-  
6 microglobulin ( $\beta$ 2m) linked covalently to the  $\alpha$ 1 domain. Chimeric constructs of this design are  
7 designated human  $\beta$ 2m/HLA/H2-D<sup>b</sup> (HHD) (36). This HLA-B\*39:06 HHD construct was  
8 injected into NOD zygotes, and founder mice were identified by PCR of tail-tip DNA using these  
9 HLA-B\*39:06 primers: 5'-CTTCATCTCAGTGGGCTAC-3' and 5'-  
10 CGGTCAGTCTGTGTGTTGG-3'. Positive progeny were further assessed for HLA-B\*39:06  
11 expression on their peripheral blood leukocytes by flow cytometry using anti-HLA-A, B, C  
12 (W6/32; BioLegend). Founder 45, with the highest expression of HLA-B\*39:06, was selected  
13 for further investigation and was crossed with an NOD mouse. Progeny of this cross were  
14 assessed for the presence of the transgene by PCR of tail-tip DNA; mice hemizygous for the  
15 transgene were designated NOD.HLA-B\*39:06<sup>Hemi</sup>. To maintain this strain, NOD.HLA-  
16 B\*39:06<sup>Hemi</sup> mice were crossed with NOD littermates. NOD.HLA-B\*39:06<sup>Hemi</sup> females were  
17 also crossed with male mice from NOD. $\beta$ 2m<sup>KO</sup> (37) or NOD. $\beta$ 2m<sup>KO</sup>.Ins2<sup>KO</sup> strains (27). To fix  
18 the HLA-B\*39:06 transgene to homozygosity, the resulting progeny were interbred as  
19 appropriate to generate HLA-B\*39:06 homozygous mice (HLA-B\*39:06<sup>Hom</sup>) with the following  
20 genotypes: NOD.HLA-B\*39:06<sup>Hom</sup>. $\beta$ 2m<sup>KO</sup>, NOD.HLA-B\*39:06<sup>Hom</sup>. $\beta$ 2m<sup>KO</sup>.Ins2<sup>Het</sup>, and  
21 NOD.HLA-B\*39:06<sup>Hom</sup>. $\beta$ 2m<sup>KO</sup>.Ins2<sup>KO</sup>. As we and others have found that female NOD. $\beta$ 2m<sup>KO</sup>  
22 mice breed poorly (38), we crossed male  $\beta$ 2m<sup>KO</sup> mice with female  $\beta$ 2m<sup>Het</sup> mice whenever  
23 possible. The WT and KO  $\beta$ 2m and WT and KO Ins2 alleles were identified by PCR using the

1 following primer pairs:  $\beta 2m^{WT}$ : 5'-GAAACCCCTCAAATTCAAGTATACTCA-3' and 5'-  
2 GACGGTCTTGGGCTCGGCCATACT-3';  $\beta 2m^{KO}$ : 5'-  
3 GAAACCCCTCAAATTCAAGTATACTCA-3' and 5'-  
4 TCGAATTCGCCAATGACAAGACGCT-3';  $Ins2^{WT}$ : 5'-GGCAGAGAGGAGGTGCTTTG-3'  
5 and 5'-AGAAAACCACAGGGTAGTTAGC-3';  $Ins2^{KO}$ : 5'-  
6 GGCAGAGAGGAGGTGCTTTG-3' and 5'-ATTGACCGTAATGGGATAGG-3'. NOD.HLA-  
7 A\*02:01 (HHD). $\beta 2m^{KO}$  mice have been previously described (21).

8  
9 *Assessment of HLA-B\*39:06 homozygosity by real-time PCR*

10 Mouse tails were numbed with ethyl chloride (Gebauer) and the tail tips were removed.  
11 Tails were digested in 200  $\mu$ l proteinase K (Roche) solution overnight at 56°C. The reaction was  
12 stopped by placing tails at 95°C for 10 min. The resultant DNA (1  $\mu$ l) was mixed with  
13 PrimeTime Gene Expression Master Mix (IDT) and each of the following primers and TaqMan  
14 probes: HLA-B\*39:06 primers (5'-TTCATCTCAGTGGGCTACG-3' and 5'-  
15 TGTGTTCCGGTCCCAATATTC-3') and probe [5'-(6-FAM)-  
16 TCGCTGTCGAACCTCACGAACTG-(Zen probe with Iowa Black)-3']; internal positive  
17 control primers (5'-CACGTGGGCTCCAGCATT-3' and 5'-TCACCAGTCATTTCTGCCTTTG-  
18 3') and probe [5'-(Cy5)-CCAATGGTCGGGCACTGCTCAA-(Black Hole Quencher 2)-3'].  
19 Real-time quantitative PCR was performed in triplicate using an iQ5 Real-time PCR Detection  
20 System (Bio-Rad). Amplification was carried out as follows: initial denaturing at 94°C for 2  
21 min, followed by 38 cycles of 20 s at 94°C, 15 s at 60°C and 10 s at 72°C. Copy numbers were  
22 calculated using the  $2^{\Delta\Delta Ct}$  method.

23  
24 *Assessment of T1D*

1 Mice were monitored weekly from 4-30 wks for glucosuria using Diastix reagent strips  
2 (Bayer). Mice were considered diabetic following two consecutive positive tests. The first  
3 positive test was recorded as the date of diabetes onset.

#### 4 5 *Histology*

6 Pancreata were fixed in Bouin's solution, sectioned at three non-overlapping levels, and  
7 stained with aldehyde fuchsin and hematoxylin and eosin. Islets were scored for insulinitis by a  
8 blinded observer as previously described (39): 0, no visible lesions; 1, peri-insular or non-  
9 invasive leukocytic aggregates; 2, <25% islet destruction; 3, 25-75% islet destruction; 4, >75%  
10 islet destruction. A mean insulinitis score was determined for each mouse by dividing the total  
11 score for each pancreas by the total number of islets examined. Diabetic mice were assigned a  
12 score of 4.

#### 13 14 *Blood collection and staining of peripheral blood leukocytes*

15 Blood (10  $\mu$ l) was collected from the mouse tail vein and added to 50  $\mu$ l PBS (pH 7.2,  
16 Gibco) with 1 mM EDTA (Sigma). Samples were mixed well and erythrocytes were lysed for 2-  
17 3 min with 200  $\mu$ l ACK lysis buffer (Lonza). Plates were centrifuged at 700xg for 3 min and  
18 ACK lysis was repeated. Following centrifugation, samples were washed twice with PBS  
19 containing 1% FBS (HyClone) and 0.1% (w/v) sodium azide. All subsequent washes and  
20 dilutions were performed using this buffer. Cells were stained with Fc Block (BD Biosciences),  
21 followed by anti-CD8 $\alpha$  (53-6.7; BD Biosciences) and anti-HLA-A, B, C (B9.12.1; Beckman  
22 Coulter) and incubated on ice for 15-20 min. Samples were washed twice, suspended in 1  $\mu$ g/ml  
23 DAPI and incubated on ice for 15-30 min. Samples were filtered through a 35- $\mu$ m cell strainer  
24 prior to data collection on a BD LSRII flow cytometer with five lasers (355 nm, 405 nm, 488



1 nm, 561 nm and 640 nm). Data were analyzed using FlowJo software (version 8.8.6).

2

3 *Serum collection and insulin ELISA*

4 Blood (20-40  $\mu$ l) was collected from the mouse tail vein and allowed to clot at room  
5 temperature for 1 h. Samples were centrifuged for 15 min at 960xg at 4°C. Serum was stored in  
6 aliquots at -20°C. Blood insulin levels were measured using the Mouse Ultrasensitive Insulin  
7 ELISA (ALPCO). Absorbance of each well at 405 nm was detected using an Emax precision  
8 microplate reader (Molecular Devices) and the results were analyzed using GraphPad Prism 7  
9 software.

10

11 *Splenocyte preparation and flow cytometry*

12 Mice were euthanized using CO<sub>2</sub> asphyxiation, followed by cervical dislocation. Spleens  
13 were harvested and placed in ice-cold RPMI (Gibco) supplemented with 10% FBS, 1% sodium  
14 pyruvate (Gibco), 1% non-essential amino acids (Gibco), 50 U/ml penicillin and 50  $\mu$ g/ml  
15 streptomycin (Gibco). Spleens were crushed, passed through a 40- $\mu$ m cell strainer and washed  
16 with RPMI. Samples were centrifuged at 486xg for 5 min. Erythrocytes were lysed in ACK  
17 lysis buffer (Lonza) for 4 min at room temperature and washed with RPMI. The resultant cells  
18 were centrifuged and washed twice with PBS. Prior to the final wash, samples were passed  
19 through a 40- $\mu$ m cell strainer. Cells were counted and suspended in PBS. Samples prepared in  
20 the above manner were added to a V-bottomed plate and centrifuged at 486xg for 5 min.  
21 Samples were washed once in PBS containing 2% FBS (HyClone). This buffer was used for all  
22 subsequent washing and dilution steps. Cells were stained with Fc Block (BD Biosciences) on  
23 ice for 10 min and washed once. For monitoring of class I MHC expression, cells were  
24 incubated on ice for 20 min with labeled anti-HLA-A, B, C (B9.12.1; Beckman Coulter), anti-

1 pan murine class I MHC (M1/42; The Jackson Laboratory), or an appropriate isotype control  
2 antibody (mouse IgG2a for B9.12.1 and rat IgG2a/κ for M1/42). For analysis of splenic immune  
3 cell populations, cells were stained with labeled anti-CD19 (6D5; BioLegend), anti-TCRβ (H57-  
4 597; BD Biosciences), anti-CD8α (53-6.7; BD Biosciences), anti-CD4 (GK1.5; BD Biosciences),  
5 and anti-CD25 (PC61.5; eBioscience). For study of TCR Vβ usage, an anti-mouse TCR Vβ  
6 screening panel was used (BD Biosciences) in conjunction with labeled anti-CD19 (6D5;  
7 BioLegend), anti-CD3ε (145-2C11; BD Biosciences), anti-CD8α (53-6.7; BD Biosciences), anti-  
8 CD4 (GK1.5; BD Biosciences), and anti-CD25 (PC61.5; eBioscience). Samples were washed  
9 twice, incubated in 1 μg/ml DAPI for 15 min on ice, and filtered through a 35-μm cell strainer  
10 prior to data collection. Data were collected on a BD LSR II flow cytometer with five lasers (355  
11 nm, 405 nm, 488 nm, 561 nm and 640 nm) and analyzed using FlowJo (version 8.8.6) and  
12 GraphPad Prism 7 software.

## 1       **RESULTS**

### 2       *NOD mice transgenic for HLA-B\*39:06 are susceptible to T1D*

3               To begin to study the association of HLA-B\*39:06 with T1D, we first developed  
4       NOD.HLA-B\*39:06 mice using a monochain HLA-B\*39:06 construct. We tracked these mice  
5       for susceptibility to disease to ensure that the integration of HLA-B\*39:06 did not interfere with  
6       T1D development. We found no decrease in disease susceptibility compared to non-transgenic  
7       littermates in either females (Fig. 1A) or males (Fig. 1B). The earliest age of onset among  
8       female mice was 14 wks, with 82% diabetic by 30 wks. In males, the earliest age of onset was at  
9       13 wks, though as expected, incidence was reduced compared to females, with only 57%  
10      converting to disease by 30 wks of age. Because females were more susceptible to disease than  
11      males, we used female mice for our subsequent experiments.

### 12       *HLA-B\*39:06 allows for the selection of CD8 T cells in NOD mice*

14              To examine the influence of HLA-B\*39:06 on T1D without the complicating factor of  
15      the concomitant expression of murine class I MHC molecules, we developed a model in which  
16      the transgenic HLA-B\*39:06 was expressed in the absence of murine  $\beta$ 2m by breeding with the  
17      NOD. $\beta$ 2m<sup>KO</sup> strain (37). Because the transgenic HLA-B\*39:06 HHD molecules contain  
18      covalently bound human  $\beta$ 2m, HLA-B\*39:06 can fold without reliance on murine  $\beta$ 2m, whereas  
19      the endogenous H2-K<sup>d</sup> and H2-D<sup>b</sup> cannot. To maximize the expression of HLA-B\*39:06 and the  
20      thymic selection of CD8 T cells, we sought to fix the HLA-B\*39:06 transgene to homozygosity  
21      (HLA-B\*39:06<sup>Hom</sup>). To do this, we first examined the level of human class I MHC on peripheral  
22      blood leukocytes from female NOD.HLA-B\*39:06. $\beta$ 2m<sup>KO</sup> mice (Fig. 2A). While all mice tested  
23      expressed human class I MHC, there appeared to be two groups of mice, one with high levels of  
24      class I MHC, with an average geometric mean fluorescence intensity (MFI) of 1534, and one

1 with low class I MHC levels, with an average MFI of 607, suggesting that the mice with  
2 increased human class I MHC levels were HLA-B\*39:06<sup>Hom</sup>. We used real-time PCR for the  
3 HLA-B\*39:06 transgene to ensure that the high expressers were indeed homozygous for HLA-  
4 B\*39:06 (Fig. 2B). We found that the average copy number of the low expressers was 1.6. This  
5 value was consistent with previous experiments with NOD.HLA-B\*39:06.β2m<sup>KO</sup> mice that were  
6 known to be hemizygous (data not shown), confirming that the human class I MHC-low mice  
7 were HLA-B\*39:06<sup>Hemi</sup>. Human class I MHC-high mice had a copy number of 3.1, nearly  
8 double what was seen in the HLA-B\*39:06<sup>Hemi</sup> mice and indicating that these mice were, in fact,  
9 homozygous for HLA-B\*39:06. We hypothesized that HLA-B\*39:06<sup>Hom</sup> mice would be capable  
10 of developing increased amounts of CD8 T cells relative to HLA-B\*39:06<sup>Hemi</sup> mice. We  
11 therefore examined the percent of blood CD8 T cells in female NOD.HLA-B\*39:06.β2m<sup>KO</sup> mice  
12 (Fig. 2C). HLA-B\*39:06<sup>Hemi</sup> mice had 1.5% CD8 T cells among their peripheral blood  
13 leukocytes, while HLA-B\*39:06<sup>Hom</sup> mice had nearly double that amount with 2.5% CD8 T cells,  
14 indicating that increased HLA-B\*39:06 expression can mediate the development of a higher  
15 percentage of CD8 T cells. Mice homozygous for HLA-B\*39:06 were used for all subsequent  
16 experiments.

17 Having observed CD8 T cells in the peripheral blood of NOD.HLA-B\*39:06.β2m<sup>KO</sup>  
18 mice, we next sought to confirm the lack of cell-surface expression of murine class I MHC on  
19 splenocytes using the pan murine class I MHC antibody M1/42. Spleens from NOD and  
20 NOD.β2m<sup>KO</sup> mice, and the previously characterized NOD.HLA-A\*02:01.β2m<sup>KO</sup> strain (21),  
21 were also examined. As expected, only NOD splenocytes showed expression of murine class I  
22 MHC (Fig. 3A). The absence of murine class I MHC in NOD.β2m<sup>KO</sup> mice results in a lack of  
23 CD8 T cells (Fig. 3B, 3C), as reported previously (37). However, we observed a partial

1 restoration of CD8 T cell development in the NOD.HLA-B\*39:06. $\beta$ 2m<sup>KO</sup> strain (Fig. 3B, 3C),  
2 demonstrating that HLA-B\*39:06 is indeed able to mediate CD8 T cell development.

3  
4 *HLA-B\*39:06 mediates T1D in NOD mice lacking murine  $\beta$ 2m*

5 We next examined the ability of HLA-B\*39:06 to mediate the development of T1D.  
6 NOD. $\beta$ 2m<sup>KO</sup> mice are protected from T1D because they lack CD8 T cells (37, 40-42). However,  
7 homozygous expression of HLA-B\*39:06 in NOD. $\beta$ 2m<sup>KO</sup> mice partially restored a disease  
8 phenotype (Fig. 4A), with the earliest age of onset at 20 wks and with 17% of NOD.HLA-  
9 B\*39:06. $\beta$ 2m<sup>KO</sup> mice diabetic at 40 wks. We therefore show here for the first time that HLA-  
10 B\*39:06 is able to independently lead to the development of T1D in mice. As previously  
11 reported (21), homozygous expression of HLA-A\*02:01 (HHD) also allowed for partial  
12 restoration of disease susceptibility (Fig. 4A). NOD.HLA-A\*02:01. $\beta$ 2m<sup>KO</sup> mice had their  
13 earliest age of onset at 10 wks of age, with 33% diabetic at 40 wks (Fig. 4A). While the age of  
14 onset in the HLA-B\*39:06 mice was later than that seen in HLA-A\*02:01 mice, the two  
15 incidence curves were statistically indistinguishable ( $p = 0.17$ ), and examination of insulinitis in n-  
16 diabetic mice of each strain revealed similar amounts of islet infiltration ( $p = 0.15$ ) (Fig. 4B).  
17 Representative islets from HLA-A\*02:01 and HLA-B\*39:06 mice are shown in Fig. 4C and 4D,  
18 respectively. Consistent with previous results (27), the majority of NOD.HLA-A\*02:01. $\beta$ 2m<sup>KO</sup>  
19 mice displayed insulinitis (Fig. 4B). Similarly, histological examination of islets from 40-wk-old  
20 NOD.HLA-B\*39:06. $\beta$ 2m<sup>KO</sup> mice revealed that, despite not all progressing to overt T1D, all mice  
21 displayed some degree of insulinitis, with 81% of mice fully infiltrated (Fig. 4B).

22  
23 *Decreased thymic insulin expression results in earlier T1D onset in HLA-B\*39:06-transgenic*  
24 *mice*

1           As little (28, 32) to no (33, 34) *Ins1* expression occurs in the thymus, NOD.*Ins2*<sup>KO</sup> mice  
2 are characterized by greatly diminished thymic insulin expression (31). They display accelerated  
3 T1D onset, increased insulinitis, increased T cell reactivity to insulin, and impaired tolerance to  
4 insulin compared to WT littermates (29-31). The impact of *Ins2* deficiency on disease is  
5 dependent on the genetic context, as NOD.HLA-A\*02:01.β2m<sup>KO</sup>.*Ins2*<sup>KO</sup> mice have a faster  
6 disease onset than NOD.*Ins2*<sup>KO</sup> mice (43), indicating that the effects of multiple risk alleles can  
7 combine to increase risk. We find that, in conjunction with HLA-B\*39:06, *Ins2* deficiency leads  
8 to a rapid onset of disease (Fig. 5A, 5B), demonstrating the importance of examining T1D in the  
9 context of multiple risk factors. Female NOD.HLA-B\*39:06.β2m<sup>KO</sup> mice had an earliest age of  
10 onset of 25 wks, with 58% diabetic at 30 wks. In contrast, NOD.HLA-B\*39:06.β2m<sup>KO</sup>.*Ins2*<sup>KO</sup>  
11 mice had an earliest age of onset of 12 wks, with 100% of this strain being diabetic by 16 wks.  
12 We have previously noted that *Ins2*<sup>Het</sup> NOD mice exhibit a modest decrease in thymic insulin  
13 expression compared to WT NOD mice (27). Comparison of incidence curves (Fig. 5A) and age  
14 at onset (Fig. 5B) showed a trend for NOD.HLA-B\*39:06.β2m<sup>KO</sup>.*Ins2*<sup>Het</sup> mice to exhibit a  
15 disease phenotype intermediate between that of their KO and WT counterparts, though the  
16 differences between the Het and WT mice did not reach statistical significance with the sample  
17 sizes available.

18  
19 *Differing amounts of thymic insulin expression do not grossly alter lymphocyte populations*

20           To determine whether the increased disease susceptibility seen in the HLA-  
21 B\*39:06.β2m<sup>KO</sup>.*Ins2*<sup>KO</sup> mice was due to gross changes in lymphocyte populations, we examined  
22 the impact of differing amounts of thymic insulin expression on splenic B cell, CD8 T cell, and  
23 CD4 T cell populations (Fig. 6A). As previously reported, NOD.HLA-A\*02:01.β2m<sup>KO</sup> mice  
24 have a reduced percentage of splenic CD8 T cells and an increased percentage of B cells and

1 CD4 T cells relative to NOD mice (21, 23). Given their similar background, we compared our  
2 three NOD.HLA-B\*39:06. $\beta$ 2m<sup>KO</sup> strains to age-matched NOD.HLA-A\*02:01. $\beta$ 2m<sup>KO</sup> mice. We  
3 found no significant changes in percentage in any of the splenocyte subsets examined (Fig. 6B).  
4 The percent of CD8 T cells found in the spleens of HLA-B\*39:06 mice was consistent with that  
5 found in blood (Fig. 2C). Furthermore, the percentage of CD4<sup>+</sup>CD25<sup>+</sup> T cells was consistent  
6 across all groups, suggesting that the change seen in disease susceptibility was not due to a  
7 differing proportion of largely regulatory T cells. Together, these data suggest that the increase  
8 in disease incidence seen in the NOD.HLA-B\*39:06. $\beta$ 2m<sup>KO</sup>.Ins2<sup>KO</sup> mice was not due to gross  
9 changes in lymphocyte composition compared to the other groups examined.

10  
11 *Thymic insulin expression does not alter TCR V $\beta$  usage, but HLA transgene identity does*

12 We next investigated whether changes in TCR V $\beta$  usage accompanied the enhanced  
13 disease observed in the NOD.HLA-B\*39:06. $\beta$ 2m<sup>KO</sup>.Ins2<sup>KO</sup> mice. For this purpose, splenocytes  
14 from NOD.HLA-B\*39:06. $\beta$ 2m<sup>KO</sup> mice and their Ins2<sup>KO</sup> counterparts were stained with a panel  
15 of anti-mouse TCR V $\beta$  antibodies. Separate examination of CD8 and CD4 T cells revealed no  
16 significant differences in TCR V $\beta$  usage between these two strains of mice (Fig. 7A, 7B). When  
17 the CD4<sup>+</sup>CD25<sup>+</sup> (largely regulatory) T cell population was examined individually, the Ins2<sup>KO</sup>  
18 mice showed a small but significant increase in the use of TCR V $\beta$ 8.1/2 when compared to  
19 Ins2<sup>WT</sup> mice, but no other changes were noted (Fig. 7C).

20 The availability of both NOD.HLA-B\*39:06. $\beta$ 2m<sup>KO</sup> and NOD.HLA-A\*02:01. $\beta$ 2m<sup>KO</sup>  
21 mice presented a unique opportunity to examine the influence of HLA transgene identity on TCR  
22 V $\beta$  usage. Examination of CD8 T cells revealed significant differences in usage of V $\beta$ 2, V $\beta$ 6,  
23 V $\beta$ 8.1/2, and V $\beta$ 11 (Fig. 7A). There were no differences in the usage of these TCR V $\beta$  families  
24 when CD4 T cell populations were studied (Fig. 7B, 7C), indicating that the presence of HLA-

1 A\*02:01 or HLA-B\*39:06 specifically alters CD8 T cell selection and/or expansion.

2

3 *Despite altered thymic insulin expression, HLA-B\*39:06-transgenic NOD mice retain typical*

4 *blood insulin levels*

5           Because of the compensatory changes observed in pancreatic *Ins* gene expression when  
6 the total number of *Ins* genes is reduced from four to two (28), we considered it unlikely that the  
7 earlier age of disease onset seen in the NOD.HLA-B\*39:06<sup>Hom</sup>.β2m<sup>KO</sup>.Ins2<sup>KO</sup> mice was due to  
8 insufficient pancreatic insulin expression. To confirm this, we measured blood insulin levels in  
9 young mice (5-6.5 wks old), well prior to disease onset (Fig. 8). We found that the level of  
10 insulin expression was statistically indistinguishable between NOD.HLA-B\*39:06<sup>Hom</sup>.β2m<sup>KO</sup>  
11 mice and their Ins2<sup>Het</sup> and Ins2<sup>KO</sup> counterparts, with an average concentration of 0.8 ng/ml,  
12 consistent with previous reports for other mouse strains (44). This supports the notion that the  
13 changes in disease onset are due to diminished immunological tolerance to insulin (30, 31) and  
14 not to an inherently decreased ability to produce insulin.



## 1 DISCUSSION

2 Multiple loci are associated with T1D risk, including a number of class I and class II  
3 MHC alleles (4). Among these, HLA-B\*39:06 is not only the most predisposing class I HLA  
4 allele in T1D patients (7, 9), but also leads to an earlier age of disease onset (11). However, due  
5 to the rarity of this allele among the populations studied thus far, investigation of the direct  
6 impact of HLA-B\*39:06 on T1D pathogenesis has not been possible (6, 7). It is important to  
7 note that HLA-B\*39:06 is more common among Latin American populations with allele  
8 frequencies of 0.03 among Mexican Americans, 0.02-0.06 among Hispanic Americans, and 0.01-  
9 0.09 among Mexicans (12). The Venezuela Perja Mountain Bari population has an allele  
10 frequency of 0.24. While T1D is relatively rare within Latin American countries, incidence is  
11 rising worldwide and new patients from these populations can be expected (14, 15). Similarly,  
12 patients carrying this genetic variant can increasingly be found in countries where T1D incidence  
13 is highest (45). While genetic background is important, environment is as well; when individuals  
14 from areas with low T1D incidence move to areas with high incidence, they assume some of the  
15 risk of their new environment (46, 47). Therefore inclusion of HLA-B\*39:06-positive patients in  
16 treatment studies is essential. As such, the development of a mouse model for the study of HLA-  
17 B\*39:06 is important as this resource can provide a useful preclinical tool for the testing of  
18 HLA-B\*39:06-directed treatments in the absence of sufficiently powered patient studies.

19 We have previously used an NOD. $\beta 2m^{KO}$ -based model to study the contribution of  
20 HLA-A\*02:01 to T1D development (21). In the current study, we found that NOD.HLA-  
21 B\*39:06<sup>Hom</sup>. $\beta 2m^{KO}$  mice develop similar amounts of CD8 T cells as their HLA-A\*02:01-  
22 transgenic counterparts (Fig. 3B, 3C), suggesting that HLA-B\*39:06 is as efficient at leading to  
23 CD8 T cell development as the more well-studied HLA-A\*02:01. Indeed, we show here for the

1 first time that HLA-B\*39:06 can directly mediate T1D in an NOD. $\beta$ 2m<sup>KO</sup> model (Fig. 4A, 5A).  
2 However, unlike HLA-A\*02:01 (21, 48), when expressed in the presence of the NOD class I  
3 MHC alleles H2-D<sup>b</sup> and H2-K<sup>d</sup>, HLA-B\*39:06 did not accelerate disease (Fig. 1). While this  
4 may be due to strain-specific differences (*e.g.*, transgene integration site), it also may speak to  
5 the importance of other aspects of the genetic environment which are known to be important for  
6 HLA-B\*39:06-related susceptibility in humans. HLA-B\*39:06 has been found to exert its effect  
7 on T1D risk in patients with specific class II MHC haplotypes, namely HLA-DR8/DQ4 (6, 49).  
8 Depending on the population studied, these class II MHCs may be independently predisposing,  
9 in which case HLA-B\*39:06 accelerates disease progression, or may have a neutral impact on  
10 T1D, in which case HLA-B\*39:06 lends risk to such patients. It has been well established that  
11 H2-A<sup>g7</sup>, the NOD class II MHC, bears great similarity to the human T1D-associated HLA-DQ8  
12 (18). HLA-DR8, part of a haplotype associated with HLA-B\*39:06, has similar peptide binding  
13 characteristics to both H2-A<sup>g7</sup> and HLA-DQ8 (50). While HLA-DR8 has been hypothesized to  
14 be the T1D-causative allele in the HLA-DR8/DQ4 haplotype, other evidence suggests that HLA-  
15 DQ4 is associated with risk of greater disease progression (51-53). Given that genetic context is  
16 important for the association between HLA-B\*39:06 and T1D risk, the lack of a class II MHC  
17 molecule similar to HLA-DQ4 in the NOD mouse model may explain why similar diabetes  
18 incidence curves were observed for NOD and NOD.HLA-B\*39:06 mice (Fig. 1). However,  
19 despite potentially not having an ideal genetic environment, HLA-B\*39:06 is still able to  
20 mediate disease and islet infiltration, as confirmed by our findings in the NOD.HLA-  
21 B\*39:06. $\beta$ 2m<sup>KO</sup> strain (Fig. 4A, 4B, 4D, 5A).

22 To more accurately model the genetic background of patients with T1D, we incorporated  
23 reduced thymic insulin expression into the NOD.HLA-B\*39:06. $\beta$ 2m<sup>KO</sup> model. We found that

1 NOD.HLA-B\*39:06. $\beta$ 2m<sup>KO</sup>.Ins2<sup>KO</sup> mice are susceptible to disease at a younger age compared to  
2 their Ins2<sup>WT</sup> counterparts (Fig. 5). Based on our findings that the gross lymphocyte populations  
3 (Fig. 6B), TCR V $\beta$  usage (Fig. 7), and blood insulin levels (Fig. 8) do not differ dramatically  
4 between these strains, the most likely explanation for the earlier age of onset in the context of  
5 reduced insulin expression is a decrease in insulin tolerance (30, 31). CD8 T cells are necessary  
6 for the development of T1D (2, 37, 40-42). As the expression of HLA-B\*39:06 restores T1D  
7 susceptibility to NOD. $\beta$ 2m<sup>KO</sup> mice (Fig. 4A, 5A) and is enhanced in the Ins2<sup>KO</sup> mice (Fig. 5A), it  
8 is likely that reduced thymic insulin expression results in an increase in CD8 T cell reactivity  
9 towards insulin. Increased CD4 T cell reactivity to insulin could also be a contributing factor.  
10 We propose that an increased HLA-B\*39:06-restricted reactivity to insulin may also contribute  
11 to the earlier age of onset seen in HLA-B\*39:06-positive patients. These points will be clarified  
12 by future investigations.

13 The NOD.HLA-B\*39:06. $\beta$ 2m<sup>KO</sup> model can be used in a variety of ways to probe the  
14 influence of HLA-B\*39:06 on T1D susceptibility. As we have successfully done for HLA-  
15 A\*02:01 (21, 22, 29), the model will allow us to identify the beta cell peptides recognized by  
16 HLA-B\*39:06-restricted T cells without the potentially confounding presence of murine class I  
17 MHC molecules. That the peptide-binding motif for HLA-B\*39:06 has recently been identified  
18 may simplify the identification of HLA-B\*39:06-restricted epitopes (54, 55). We have  
19 previously identified HLA-A\*02:01-restricted epitopes in an NOD. $\beta$ 2m<sup>KO</sup>-based model (21, 22,  
20 29); these epitopes were the same or similar to those found in human T1D patients expressing  
21 this class I variant (21, 23). Thus the use of the NOD.HLA-B\*39:06. $\beta$ 2m<sup>KO</sup> models could  
22 provide a direct translational impact. Identification of HLA-B\*39:06-restricted epitopes can  
23 allow for their use in epitope-directed therapies; these are an attractive option as they can allow

1 for treatments targeted at specific epitopes without the risk of off-site effects. Furthermore,  
2 knowledge of targeted epitopes allows for the tracking of response to therapy, *e.g.*, through the  
3 use of peptide-MHC tetramers. Such therapies require preclinical testing, representing another  
4 future use of the NOD.HLA-B\*39:06. $\beta$ 2m<sup>KO</sup> models.

5 Finally, it is important to appreciate that not all HLA class I molecules influence T1D in  
6 the same way or to the same degree when expressed in NOD mouse models. For example, when  
7 expressed along with H2-D<sup>b</sup> and H2-K<sup>d</sup> in NOD mice, HLA-A\*02:01 accelerates disease onset  
8 (21, 48), HLA-A\*11:01 (56) and HLA-B\*39:06 (Fig. 1) have no effect, and HLA-B\*27 is  
9 protective (48). When we compared the TCR V $\beta$  usage among CD8 T cells in mice transgenic  
10 for either HLA-A\*02:01 or HLA-B\*39:06 and lacking murine class I MHC molecules (Fig. 7A),  
11 we found that four TCR V $\beta$  families were differentially expressed. This was initially a  
12 surprising finding, as until recently it was not generally thought that a given TCR V $\beta$  family had  
13 any preference for a particular MHC allele (57). Recently, however, usage of TCR V $\beta$  (and V $\alpha$ )  
14 genes has been found to be associated with MHC genotype in humans, leading to the proposal  
15 that different TCR V gene products may indeed have a bias toward particular MHC alleles (58).  
16 Our results using the NOD.HLA-B\*39:06. $\beta$ 2m<sup>KO</sup> and NOD.HLA-A\*02:01. $\beta$ 2m<sup>KO</sup> strains (Fig.  
17 7A) support this view and represent a valuable system to explore this phenomenon further.  
18 Differences in TCR repertoire could help to explain the differential T1D susceptibility observed  
19 not only in NOD mice transgenic for different HLA class I alleles, but, more importantly, in  
20 humans as well.

21 In sum, we have established that HLA-B\*39:06 can directly mediate T1D in the NOD  
22 mouse model, confirming the results seen in multiple genome-wide association studies (5, 7).  
23 We have furthermore developed models for HLA-B\*39:06 in a genetic context more relevant to

- 1 human disease by incorporating reduced thymic insulin expression. These models will allow a
- 2 detailed investigation of the influence of HLA-B\*39:06 on T1D development.

1        **ACKNOWLEDGMENTS**

2        We thank Denisa Ferastraoaru for assistance with the preparation of the monochain chimeric  
3        HLA-B\*39:06 construct. We acknowledge The Jackson Laboratory Transgenic Genotyping  
4        Core for developing the real-time PCR assay for monitoring HLA-B\*39:06 homozygosity.

1       **REFERENCES**

- 2
- 3       1.       Roep, B. O., and M. Peakman. 2011. Diabetogenic T lymphocytes in human Type 1
- 4               diabetes. *Curr. Opin. Immunol.* 23: 746-753.
- 5       2.       Varela-Calvino, R., C. Calvino-Sampedro, I. Gomez-Tourino, and O. J. Cordero. 2017.
- 6               Apportioning blame: autoreactive CD4<sup>+</sup> and CD8<sup>+</sup> T cells in type 1 diabetes. *Arch.*
- 7               *Immunol. Ther. Exp. (Warsz.)* 65: 275-284.
- 8       3.       Ferris, S. T., J. A. Carrero, and E. R. Unanue. 2016. Antigen presentation events during
- 9               the initiation of autoimmune diabetes in the NOD mouse. *J. Autoimmun.* 71: 19-25.
- 10      4.       Noble, J. A., and A. M. Valdes. 2011. Genetics of the HLA region in the prediction of
- 11              type 1 diabetes. *Curr. Diab. Rep.* 11: 533-542.
- 12      5.       Howson, J. M., N. M. Walker, D. Clayton, and J. A. Todd. 2009. Confirmation of HLA
- 13              class II independent type 1 diabetes associations in the major histocompatibility complex
- 14              including HLA-B and HLA-A. *Diabetes Obes. Metab.* 11 Suppl 1: 31-45.
- 15      6.       Mikk, M. L., T. Heikkinen, M. I. El-Amir, M. Kiviniemi, A. P. Laine, T. Harkonen, R.
- 16              Veijola, J. Toppari, M. Knip, and J. Ilonen. 2017. The association of the HLA-A\*24:02,
- 17              B\*39:01 and B\*39:06 alleles with type 1 diabetes is restricted to specific HLA-DR/DQ
- 18              haplotypes in Finns. *HLA* 89: 215-224.
- 19      7.       Nejentsev, S., J. M. Howson, N. M. Walker, J. Szeszko, S. F. Field, H. E. Stevens, P.
- 20              Reynolds, M. Hardy, E. King, J. Masters, J. Hulme, L. M. Maier, D. Smyth, R. Bailey, J.
- 21              D. Cooper, G. Ribas, R. D. Campbell, D. G. Clayton, and J. A. Todd. 2007. Localization
- 22              of type 1 diabetes susceptibility to the MHC class I genes HLA-B and HLA-A. *Nature*
- 23              450: 887-892.
- 24      8.       Noble, J. A., A. M. Valdes, T. L. Bugawan, R. J. Apple, G. Thomson, and H. A. Erlich.

- 1           2002. The HLA class I A locus affects susceptibility to type 1 diabetes. *Hum. Immunol.*  
2           63: 657-664.
- 3       9.     Noble, J. A., A. M. Valdes, M. D. Varney, J. A. Carlson, P. Moonsamy, A. L. Fear, J. A.  
4           Lane, E. Lavant, R. Rappner, A. Louey, P. Concannon, J. C. Mychaleckyj, and H. A.  
5           Erlich. 2010. HLA class I and genetic susceptibility to type 1 diabetes: results from the  
6           Type 1 Diabetes Genetics Consortium. *Diabetes* 59: 2972-2979.
- 7       10.    DiLorenzo, T. P., M. Peakman, and B. O. Roep. 2007. Translational mini-review series  
8           on type 1 diabetes: Systematic analysis of T cell epitopes in autoimmune diabetes. *Clin.*  
9           *Exp. Immunol.* 148: 1-16.
- 10      11.    Valdes, A. M., H. A. Erlich, and J. A. Noble. 2005. Human leukocyte antigen class I B  
11           and C loci contribute to Type 1 Diabetes (T1D) susceptibility and age at T1D onset.  
12           *Hum. Immunol.* 66: 301-313.
- 13      12.    Gonzalez-Galarza, F. F., L. Y. Takeshita, E. J. Santos, F. Kempson, M. H. Maia, A. L. da  
14           Silva, A. L. Teles e Silva, G. S. Ghattaoraya, A. Alfirevic, A. R. Jones, and D. Middleton.  
15           2015. Allele Frequency Net 2015 update: new features for HLA epitopes, KIR and  
16           disease and HLA adverse drug reaction associations. *Nucleic Acids Res.* 43: D784-788.
- 17      13.    Lerner, A., P. Jeremias, and T. Matthias. 2015. The world incidence and prevalence of  
18           autoimmune diseases is increasing. *Int. J. Celiac Dis.* 3: 151-155.
- 19      14.    Carrasco, E., F. Perez-Bravo, J. Dorman, A. Mondragon, and J. L. Santos. 2006.  
20           Increasing incidence of type 1 diabetes in population from Santiago of Chile: trends in a  
21           period of 18 years (1986-2003). *Diabetes Metab. Res. Rev.* 22: 34-37.
- 22      15.    Gomez-Diaz, R. A., N. Garibay-Nieto, N. Wachter-Rodarte, and C. A. Aguilar-Salinas.  
23           2014. Epidemiology of type 1 diabetes in Latin America. *Curr. Diabetes Rev.* 10: 75-85.





- 1      24.    Vafiadis, P., S. T. Bennett, J. A. Todd, J. Nadeau, R. Grabs, C. G. Goodyer, S.  
2            Wickramasinghe, E. Colle, and C. Polychronakos. 1997. Insulin expression in human  
3            thymus is modulated by INS VNTR alleles at the IDDM2 locus. *Nat. Genet.* 15: 289-292.
- 4      25.    Kelly, M. A., M. L. Rayner, C. H. Mijovic, and A. H. Barnett. 2003. Molecular aspects of  
5            type 1 diabetes. *Mol. Pathol.* 56: 1-10.
- 6      26.    Howson, J. M., N. M. Walker, D. J. Smyth, and J. A. Todd. 2009. Analysis of 19 genes  
7            for association with type I diabetes in the Type I Diabetes Genetics Consortium families.  
8            *Genes Immun.* 10 Suppl 1: S74-84.
- 9      27.    Babad, J., R. Ali, J. Schloss, and T. P. DiLorenzo. 2016. An HLA-transgenic mouse  
10            model of type 1 diabetes that incorporates the reduced but not abolished thymic insulin  
11            expression seen in patients. *J. Diabetes Res.* 2016: 7959060.
- 12     28.    Chentoufi, A. A., and C. Polychronakos. 2002. Insulin expression levels in the thymus  
13            modulate insulin-specific autoreactive T-cell tolerance: the mechanism by which the  
14            *IDDM2* locus may predispose to diabetes. *Diabetes* 51: 1383-1390.
- 15     29.    Jarchum, I., and T. P. DiLorenzo. 2010. Ins2 deficiency augments spontaneous HLA-  
16            A\*0201-restricted T cell responses to insulin. *J. Immunol.* 184: 658-665.
- 17     30.    Moriyama, H., N. Abiru, J. Paronen, K. Sikora, E. Liu, D. Miao, D. Devendra, J. Beilke,  
18            R. Gianani, R. G. Gill, and G. S. Eisenbarth. 2003. Evidence for a primary islet  
19            autoantigen (preproinsulin 1) for insulinitis and diabetes in the nonobese diabetic mouse.  
20            *Proc. Natl. Acad. Sci. U. S. A.* 100: 10376-10381.
- 21     31.    Thebault-Baumont, K., D. Dubois-Laforgue, P. Krief, J. P. Briand, P. Halbout, K.  
22            Vallon-Geoffroy, J. Morin, V. Laloux, A. Lehuen, J. C. Carel, J. Jami, S. Muller, and C.  
23            Boitard. 2003. Acceleration of type 1 diabetes mellitus in proinsulin 2-deficient NOD

- 1 mice. *J. Clin. Invest.* 111: 851-857.
- 2 32. Fan, Y., W. A. Rudert, M. Grupillo, J. He, G. Sisino, and M. Trucco. 2009. Thymus-  
3 specific deletion of insulin induces autoimmune diabetes. *EMBO J.* 28: 2812-2824.
- 4 33. Deltour, L., P. Leduque, N. Blume, O. Madsen, P. Dubois, J. Jami, and D. Bucchini.  
5 1993. Differential expression of the two nonallelic proinsulin genes in the developing  
6 mouse embryo. *Proc. Natl. Acad. Sci. U. S. A.* 90: 527-531.
- 7 34. Heath, V. L., N. C. Moore, S. M. Parnell, and D. W. Mason. 1998. Intrathymic  
8 expression of genes involved in organ specific autoimmune disease. *J. Autoimmun.* 11:  
9 309-318.
- 10 35. Faideau, B., J. P. Briand, C. Lotton, I. Tardivel, P. Halbout, J. Jami, J. F. Elliott, P. Krief,  
11 S. Muller, C. Boitard, and J. C. Carel. 2004. Expression of preproinsulin-2 gene shapes  
12 the immune response to preproinsulin in normal mice. *J. Immunol.* 172: 25-33.
- 13 36. Pascolo, S., N. Bervas, J. M. Ure, A. G. Smith, F. A. Lemonnier, and B. Perarnau. 1997.  
14 HLA-A2.1-restricted education and cytolytic activity of CD8<sup>+</sup> T lymphocytes from  $\beta$ 2  
15 microglobulin ( $\beta$ 2m) HLA-A2.1 monochain transgenic H-2D<sup>b</sup>  $\beta$ 2m double knockout  
16 mice. *J. Exp. Med.* 185: 2043-2051.
- 17 37. Serreze, D. V., E. H. Leiter, G. J. Christianson, D. Greiner, and D. C. Roopenian. 1994.  
18 Major histocompatibility complex class I-deficient NOD-*B2m*<sup>null</sup> mice are diabetes and  
19 insulinitis resistant. *Diabetes* 43: 505-509.
- 20 38. Cooper, J. C., G. B. Dealtry, M. A. Ahmed, P. C. Arck, B. F. Klapp, S. M. Blois, and N.  
21 Fernandez. 2007. An impaired breeding phenotype in mice with a genetic deletion of  
22 beta-2 microglobulin and diminished MHC class I expression: role in reproductive  
23 fitness. *Biol. Reprod.* 77: 274-279.



- 1      46.    Soderstrom, U., J. Aman, and A. Hjern. 2012. Being born in Sweden increases the risk  
2            for type 1 diabetes - a study of migration of children to Sweden as a natural experiment.  
3            *Acta Paediatr.* 101: 73-77.
- 4      47.    Hussen, H. I., D. Yang, S. Cnattingius, and T. Moradi. 2013. Type I diabetes among  
5            children and young adults: the role of country of birth, socioeconomic position and sex.  
6            *Pediatr. Diabetes* 14: 138-148.
- 7      48.    Marron, M. P., R. T. Graser, H. D. Chapman, and D. V. Serreze. 2002. Functional  
8            evidence for the mediation of diabetogenic T cell responses by HLA-A2.1 MHC class I  
9            molecules through transgenic expression in NOD mice. *Proc. Natl. Acad. Sci. U. S. A.* 99:  
10           13753-13758.
- 11     49.    Baschal, E. E., P. R. Baker, K. R. Eyring, J. C. Siebert, J. M. Jasinski, and G. S.  
12            Eisenbarth. 2011. The HLA-B 3906 allele imparts a high risk of diabetes only on specific  
13            HLA-DR/DQ haplotypes. *Diabetologia* 54: 1702-1709.
- 14     50.    Muixi, L., M. Gay, P. M. Munoz-Torres, C. Guitart, J. Cedano, J. Abian, I. Alvarez, and  
15            D. Jaraquemada. 2011. The peptide-binding motif of HLA-DR8 shares important  
16            structural features with other type 1 diabetes-associated alleles. *Genes Immun.* 12: 504-  
17            512.
- 18     51.    Mimura, T., H. Funatsu, Y. Uchigata, S. Kitano, H. Noma, E. Shimizu, Y. Konno, S.  
19            Amano, M. Araie, O. Yoshino, Y. Iwamoto, and S. Hori. 2003. Relationship between  
20            human leukocyte antigen status and proliferative diabetic retinopathy in patients with  
21            younger-onset type 1 diabetes mellitus. *Am. J. Ophthalmol.* 135: 844-848.
- 22     52.    Hanafusa, T., and A. Imagawa. 2007. Fulminant type 1 diabetes: a novel clinical entity  
23            requiring special attention by all medical practitioners. *Nat. Clin. Pract. Endocrinol.*

- 1            *Metab.* 3: 36-45.
- 2        53.    Parry, C. S., and B. R. Brooks. 2008. A new model defines the minimal set of  
3            polymorphism in HLA-DQ and -DR that determines susceptibility and resistance to  
4            autoimmune diabetes. *Biol. Direct* 3: 42.
- 5        54.    Eichmann, M., A. de Ru, P. A. van Veelen, M. Peakman, and D. Kronenberg-Versteeg.  
6            2014. Identification and characterisation of peptide binding motifs of six autoimmune  
7            disease-associated human leukocyte antigen-class I molecules including HLA-B\*39:06.  
8            *Tissue Antigens* 84: 378-388.
- 9        55.    Sidney, J., J. Schloss, C. Moore, M. Lindvall, A. Wriston, D. F. Hunt, J. Shabanowitz, T.  
10           P. DiLorenzo, and A. Sette. 2016. Characterization of the peptide binding specificity of  
11           the HLA class I alleles B\*38:01 and B\*39:06. *Immunogenetics* 68: 231-236.
- 12       56.    Antal, Z., J. C. Baker, C. Smith, I. Jarchum, J. Babad, G. Mukherjee, Y. Yang, J. Sidney,  
13           A. Sette, P. Santamaria, and T. P. DiLorenzo. 2012. Beyond HLA-A\*0201: New HLA-  
14           transgenic NOD mouse models of type 1 diabetes identify the insulin C-peptide as a rich  
15           source of CD8<sup>+</sup> T cell epitopes. *J. Immunol.* 188: 5766-5775. .
- 16       57.    Garcia, K. C., J. J. Adams, D. Feng, and L. K. Ely. 2009. The molecular basis of TCR  
17           germline bias for MHC is surprisingly simple. *Nat. Immunol.* 10: 143-147.
- 18       58.    Sharon, E., L. V. Sibener, A. Battle, H. B. Fraser, K. C. Garcia, and J. K. Pritchard. 2016.  
19           Genetic variation in MHC proteins is associated with T cell receptor expression biases.  
20           *Nat. Genet.* 48: 995-1002.

21

1        **FOOTNOTES**

2        <sup>1</sup> This work was supported by the National Institutes of Health (R01 DK064315, R01  
3        DK094327, and R03 AI119225 to T.P.D.; R01 DK046266, R01 DK095735, and U54  
4        OD020351-5022 to D.V.S.; F30 DK103368 to J.S.; F32 DK111078 to J.J.R.; T32 GM007288  
5        which supported J.S.; P30 CA013330 which supports the Cancer Center of the Albert Einstein  
6        College of Medicine; P30 CA034196 which supports the Cancer Center of The Jackson  
7        Laboratory; and P60 DK020541 which supports the Diabetes Research Center of the Albert  
8        Einstein College of Medicine) and the American Diabetes Association (1-16-IBS-069 to T.P.D.).  
9        T.P.D. is the Diane Belfer, Cypres & Endelson Families Faculty Scholar in Diabetes Research.

10       <sup>2</sup> Address correspondence and reprint requests to Teresa P. DiLorenzo (Department of  
11       Microbiology and Immunology, Albert Einstein College of Medicine, 1300 Morris Park Ave.,  
12       Bronx, NY 10461; E-mail address: [teresa.dilorenzo@einstein.yu.edu](mailto:teresa.dilorenzo@einstein.yu.edu))

13       <sup>3</sup> Abbreviations used in this paper:  $\beta$ 2m,  $\beta$ <sub>2</sub>-microglobulin; Het, heterozygous; HHD, human  
14        $\beta$ 2m/HLA/H2-D<sup>b</sup>; Hom, homozygous; Ins2, insulin 2; KO, knockout; MFI, mean fluorescence  
15       intensity; T1D, type 1 diabetes; VNTR, variable number of tandem repeats; WT, wild-type.

16

1 **FIGURE LEGENDS**

2 **Figure 1. HLA-B\*39:06-transgenic NOD mice are susceptible to T1D.** Diabetes incidence  
3 curves for female (A) and male (B) NOD.HLA-B\*39:06 mice and non-transgenic NOD  
4 littermates are shown. (A)  $p = 0.26$ , Mantel-Cox; (B)  $p = 0.64$ , Mantel-Cox.

5  
6 **Figure 2. HLA-B\*39:06 expression and CD8 T cell development in NOD.HLA-**  
7 **B\*39:06. $\beta$ 2m<sup>KO</sup> hemizygous and homozygous mice.** (A) Peripheral blood leukocytes from  
8 eight NOD.HLA-B\*39:06. $\beta$ 2m<sup>KO</sup> mice were analyzed by flow cytometry for expression of  
9 human class I MHC. Left panel: representative histograms for an MFI-high (black line) and an  
10 MFI-low mouse (filled gray) are shown. Right panel: geometric MFI of the positive population  
11 for each mouse is displayed. Each circle represents an individual mouse. Lines denote mean  $\pm$   
12 SEM ( $p = 0.029$ , Mann-Whitney). (B) DNA from four mice per group was assessed for HLA-  
13 B\*39:06 copy number by quantitative PCR. Each circle represents an individual mouse. Lines  
14 denote mean  $\pm$  SEM ( $p = 0.029$ , Mann-Whitney). (C) The percent of CD8 T cells among  
15 peripheral blood leukocytes was assessed for four mice per group by flow cytometry. Left  
16 panels: representative plots for an MFI-low (left) and an MFI-high mouse (right) are shown.  
17 Right panel: The percent of CD8 T cells among blood leukocytes is shown. Each circle  
18 represents an individual mouse. Lines denote mean  $\pm$  SEM ( $p = 0.029$ , Mann-Whitney).

19  
20 **Figure 3. HLA-B\*39:06 allows for the development of CD8 T cells in NOD mice.**

21 Splenocytes from the indicated mouse strains were analyzed by flow cytometry for human and  
22 murine class I MHC expression (A) and percentages of the indicated T cell subsets among  
23 TCR $\beta$ <sup>+</sup> cells (B) or splenocytes (C). (B-C) Lines denote mean  $\pm$  SEM;  $p$  values are indicated  
24 (Mann-Whitney).



1  
2 **Figure 4. NOD.HLA-B\*39:06<sup>Hom</sup>.β2m<sup>KO</sup> mice are susceptible to T1D.** (A) The results of  
3 diabetes incidence studies performed at The Jackson Laboratory using female NOD.HLA-  
4 B\*39:06<sup>Hom</sup>.β2m<sup>KO</sup> and NOD.HLA-A\*02:01.β2m<sup>KO</sup> mice are shown (p = 0.17, Mantel-Cox).  
5 (B) Female non-diabetic NOD.HLA-A\*02:01.β2m<sup>KO</sup> (n = 16) and NOD.HLA-  
6 B\*39:06<sup>Hom</sup>.β2m<sup>KO</sup> mice (n = 16) were euthanized at 40 wks and mean insulinitis scores  
7 determined as described in *Materials and Methods*. Each circle represents an individual mouse.  
8 Lines represent mean ± SEM (p = 0.15, Mann-Whitney). Representative islets with their  
9 assigned scores for the female non-diabetic NOD.HLA-A\*02:01.β2m<sup>KO</sup> (C) and NOD.HLA-  
10 B\*39:06<sup>Hom</sup>.β2m<sup>KO</sup> mice (D) are shown. Scale bar represents 100 μm.

11  
12 **Figure 5. HLA-B\*39:06<sup>Hom</sup> mice display increased diabetes development in the context of**  
13 **reduced thymic insulin expression.** (A) The results of diabetes incidence studies performed at  
14 Albert Einstein College of Medicine using female NOD.HLA-B\*39:06<sup>Hom</sup>.β2m<sup>KO</sup> mice (n = 6)  
15 and their Ins2<sup>Het</sup> (n = 11) and Ins2<sup>KO</sup> (n = 7) counterparts are shown; p values are indicated  
16 (Mantel-Cox). (B) The ages at onset for all mice in (A) that became diabetic during the  
17 incidence study are plotted. Each circle represents an individual mouse. Lines denote mean ±  
18 SEM; p values are indicated (Mann-Whitney). Ins2<sup>WT</sup>, n = 3; Ins2<sup>Het</sup>, n = 9; Ins2<sup>KO</sup>, n = 7.

19  
20 **Figure 6. Splenocyte composition does not differ among NOD.HLA-B\*39:06<sup>Hom</sup>.β2m<sup>KO</sup>**  
21 **mice regardless of Ins2 genotype.** Splenocytes from three female mice per group (16-25 wks  
22 of age) were analyzed by flow cytometry for percentages of lymphocyte populations. (A) Gating  
23 strategy. (B) Percentages of the indicated cell populations are shown. Graph depicts mean +  
24 SEM.

25

1 **Figure 7. Class I HLA transgene identity dramatically alters TCR V $\beta$  usage among CD8 T**  
2 **cells, but thymic insulin expression does not.** Splenocytes from three female mice per group  
3 were analyzed by flow cytometry for TCR V $\beta$  usage. (A) CD8 T cells, (B) CD4 T cells, and (C)  
4 CD4<sup>+</sup>CD25<sup>+</sup> T cells were considered separately. Graphs depict mean + SEM; p values are  
5 indicated (t test). Significant differences between NOD.HLA-B\*39:06. $\beta$ 2m<sup>KO</sup> and NOD.HLA-  
6 A\*02:01. $\beta$ 2m<sup>KO</sup> mice are indicated with p values, as are those between NOD.HLA-  
7 B\*39:06. $\beta$ 2m<sup>KO</sup> and NOD.HLA-B\*39:06. $\beta$ 2m<sup>KO</sup>.Ins2<sup>KO</sup> mice.

8  
9 **Figure 8. Blood insulin levels in young NOD.HLA-B\*39:06. $\beta$ 2m<sup>KO</sup> mice do not vary**  
10 **regardless of Ins2 genotype.** Serum was collected from NOD.HLA-B\*39:06<sup>Hom</sup>. $\beta$ 2m<sup>KO</sup> mice  
11 (5-6.5 wks old) having the indicated Ins2 genotypes (Ins2<sup>WT</sup>, n = 9; Ins2<sup>Het</sup>, n = 14; Ins2<sup>KO</sup>, n =  
12 6) in the morning, and insulin levels were measured by ELISA. Each circle represents an  
13 individual mouse. Lines denote mean  $\pm$  SEM; p values are indicated (Mann-Whitney).

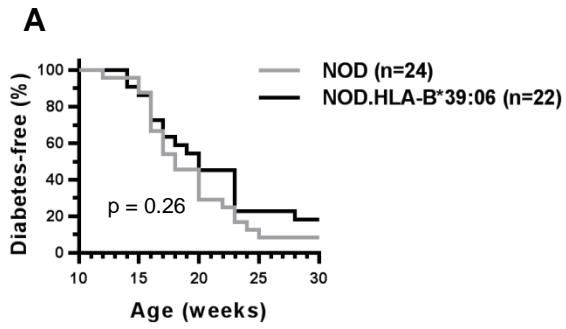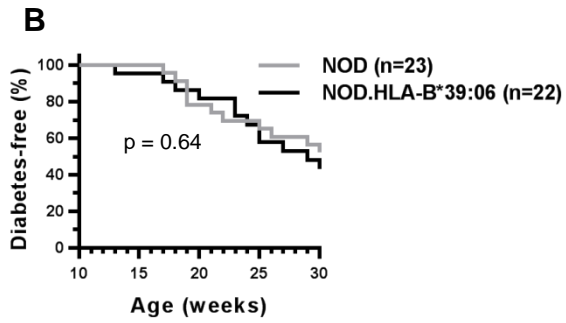

Figure 1

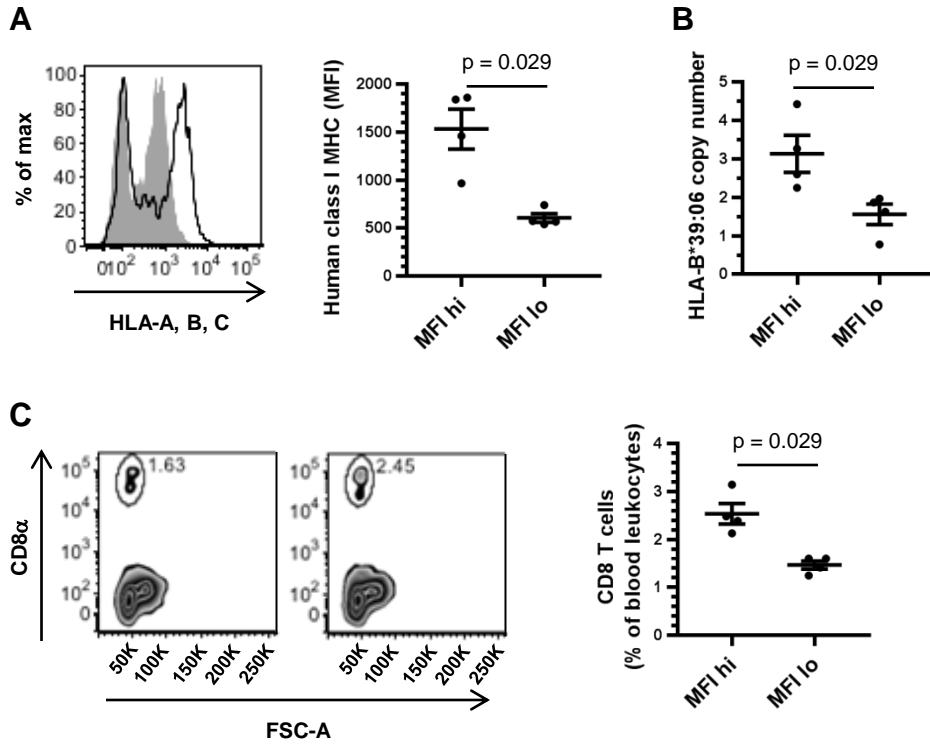

Figure 2

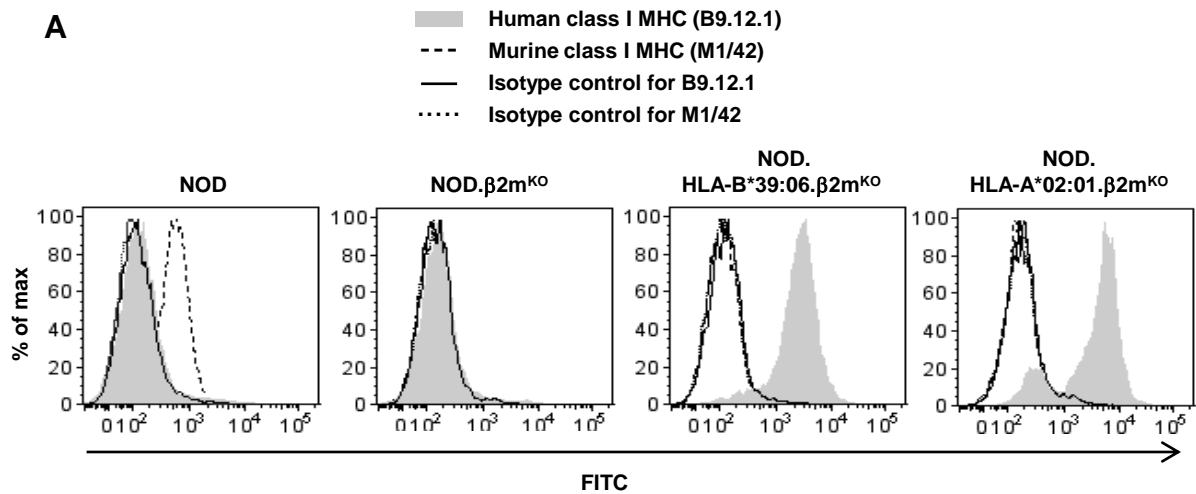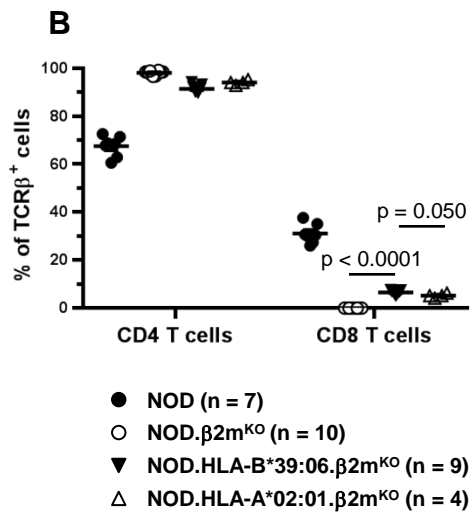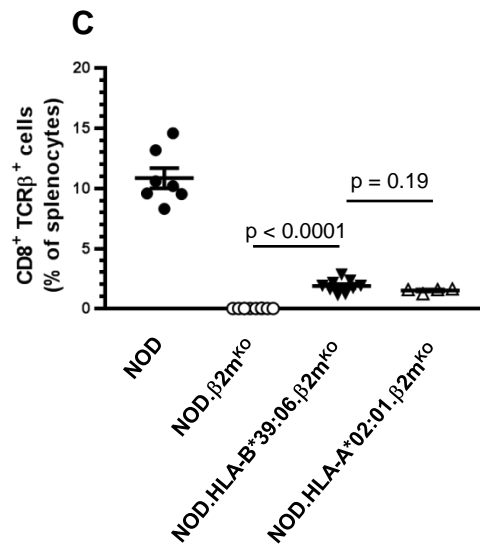

Figure 3

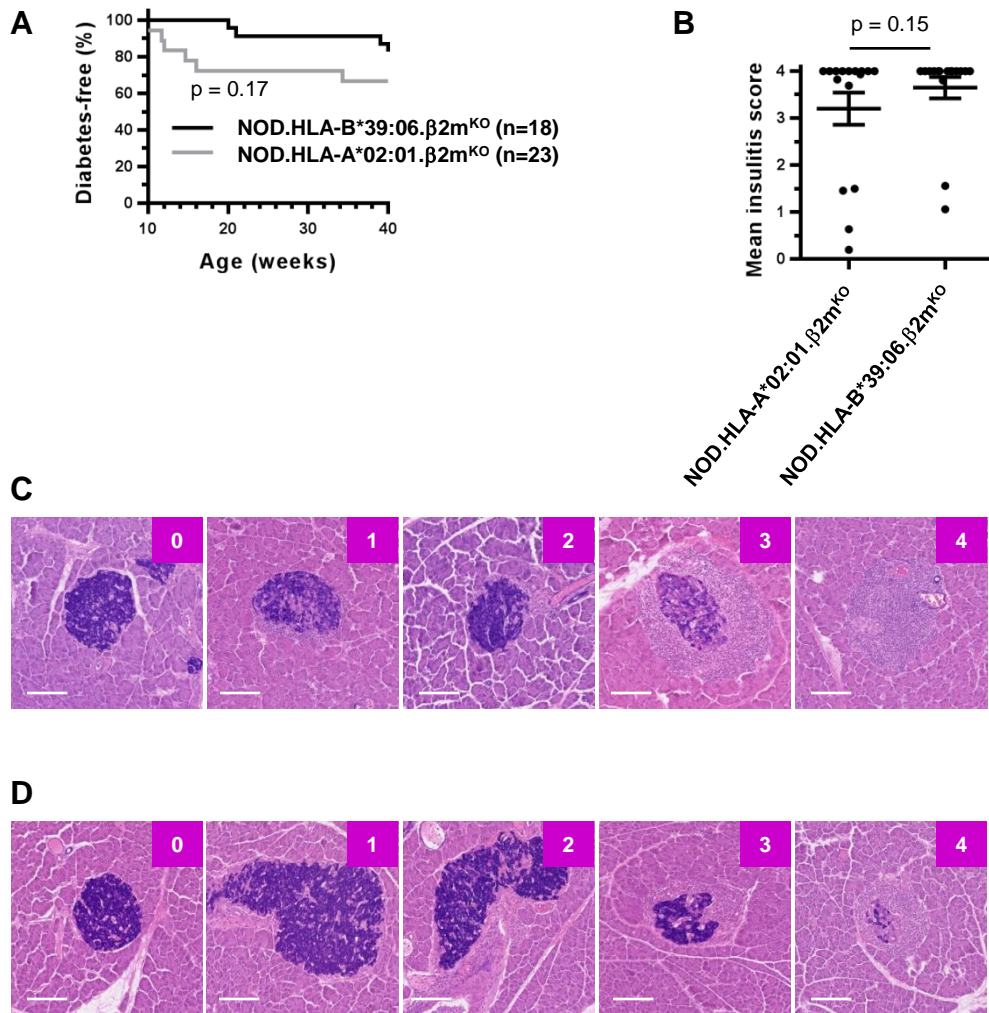

Figure 4

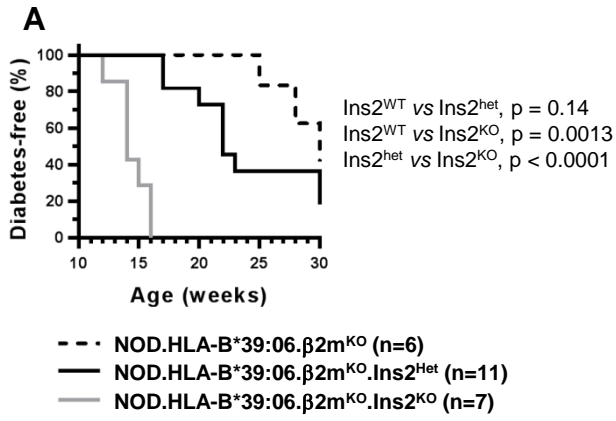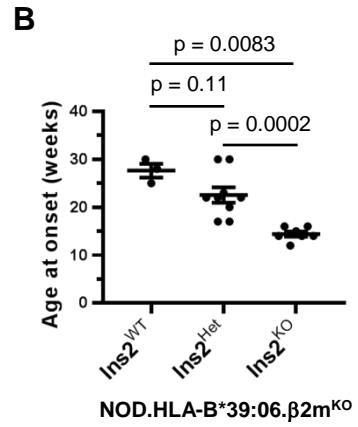

Figure 5

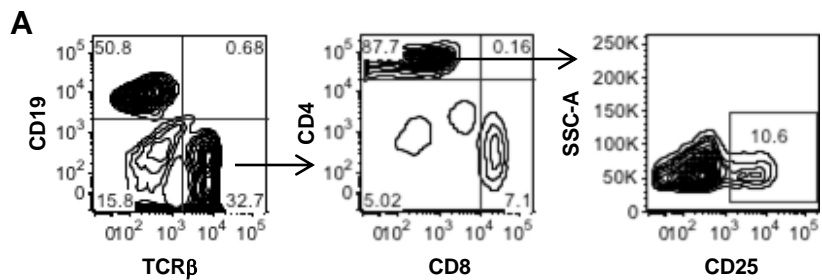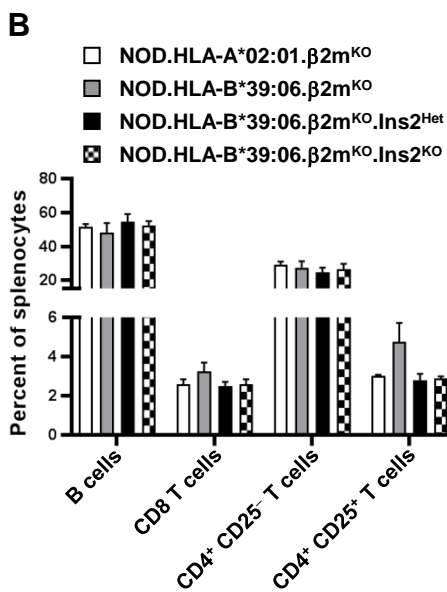

Figure 6



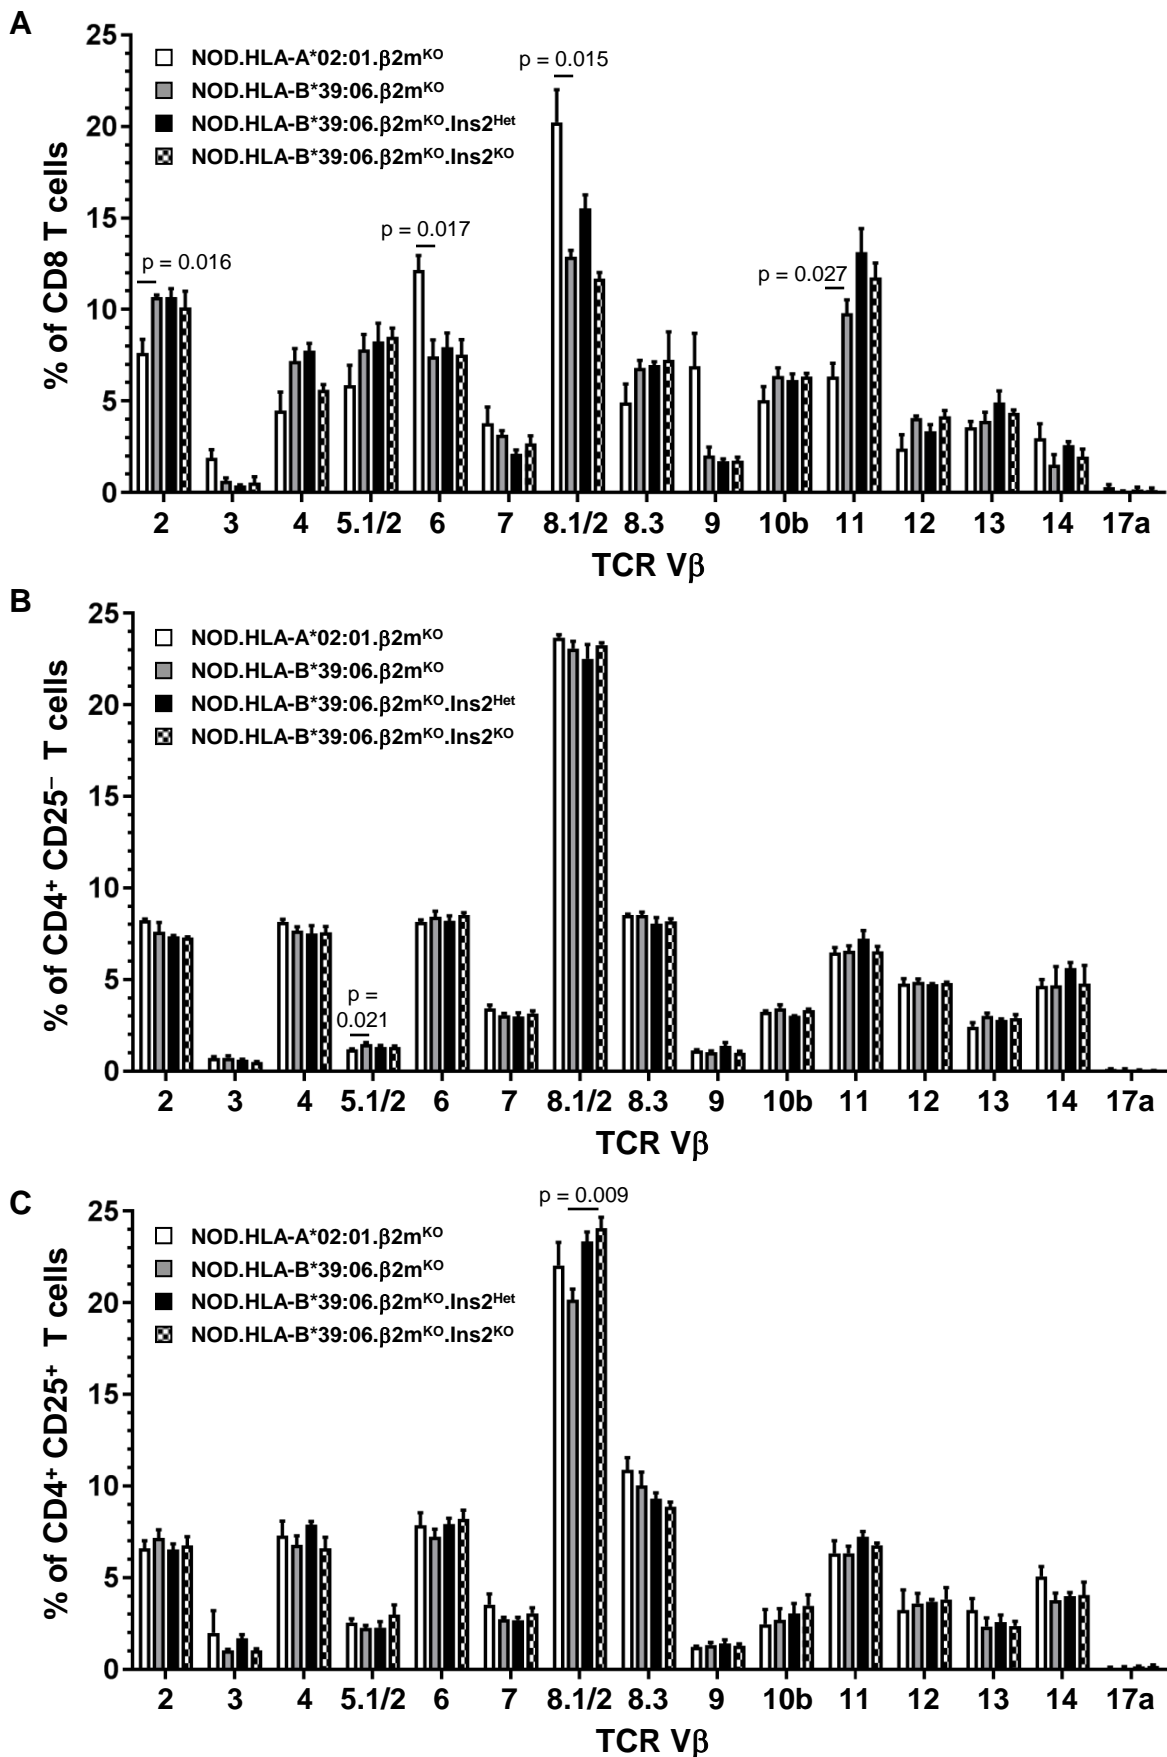

Figure 7

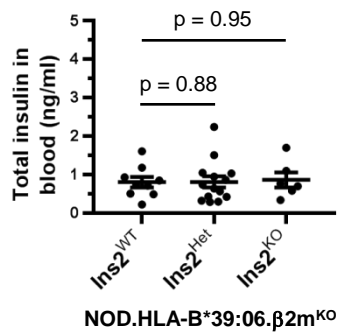

Figure 8
